# Supplementary material
Source: ML conference proceedings conference paper supplement (https://openaccess.thecvf.com/content/CVPR2024/html/Feng_PIE-NeRF_Physics-based_Interactive_CVPR_2024_paper.html)
Supplement: Supplementary file 1 [file Feng_PIE-NeRF_Physics-based_Interactive_CVPR_2024_supplemental.zip]

Archive with 2 entries (2 files):
- sup_doc.pdf
- video.mp4
