# Supplementary material
Source: ML conference proceedings conference paper supplement (https://openaccess.thecvf.com/content/CVPR2024/html/Feng_PIE-NeRF_Physics-based_Interactive_CVPR_2024_paper.html)
Supplement: Supplementary file 1 [file Feng_PIE-NeRF_Physics-based_Interactive_CVPR_2024_supplemental.zip › sup_doc.pdf]

# PIE-NeRF: Physics-based Interactive Elastodynamics with NeRF

## Supplementary Material

### A. Weight derivatives

The displacement field of with Q-GMLS interpolation is  $\mathbf{u}(\mathbf{x}) = \mathbf{J}(\mathbf{x})\mathbf{q}$  (i.e., Eq (9)), where  $\mathbf{J} = [N_1\mathbf{I}, N_1^2\mathbf{I}, N_1^3\mathbf{I}, \dots, N_1^{30}\mathbf{I}] \in \mathbb{R}^{3 \times 30n}$ . The Jacobian and Hessian matrices of  $\mathbf{J}$ ,  $\nabla \mathbf{J}_k^\top$  and  $\nabla^2 \mathbf{J}_k^\top$ , are required in IP integration and IP ray warping.

The computation of derivatives boils down to the computation of the Jacobian and Hessian matrices of Q-GMLS weighting functions  $N_i$ ,  $N_i^j$  and  $N_i^{jk}$ . Recall our weighting functions:

$$\begin{aligned} N_i(\mathbf{x}) &= \mathbf{p}^\top(\mathbf{x})\mathbf{G}^{-1}(\mathbf{x})\mathbf{p}(\mathbf{x}_i)w(\mathbf{x} - \mathbf{x}_i), \\ N_i^j(\mathbf{x}) &= \mathbf{p}^\top(\mathbf{x})\mathbf{G}^{-1}(\mathbf{x})\mathbf{p}_{,j}(\mathbf{x}_i)w(\mathbf{x} - \mathbf{x}_i), \\ N_i^{jk}(\mathbf{x}) &= \mathbf{p}^\top(\mathbf{x})\mathbf{G}^{-1}(\mathbf{x})\mathbf{p}_{,jk}(\mathbf{x}_i)w(\mathbf{x} - \mathbf{x}_i), \end{aligned}$$

where  $\mathbf{p}(\mathbf{x}) = [1, x, y, z, x^2, xy, xz, y^2, yz, z^2]^\top$  is the Q-GMLS polynomial basis, and  $\mathbf{p}_{,j}$ ,  $\mathbf{p}_{,jk}$  are its first- and second-order derivative respectively, which are trivial to compute. The notations can be simplified as:

$$\begin{aligned} N_i(\mathbf{x}) &= \mathbf{S}(\mathbf{x})\mathbf{p}(\mathbf{x}_i), \\ N_i^j(\mathbf{x}) &= \mathbf{S}(\mathbf{x})\mathbf{p}_{,j}(\mathbf{x}_i), \\ N_i^{jk}(\mathbf{x}) &= \mathbf{S}(\mathbf{x})\mathbf{p}_{,jk}(\mathbf{x}_i), \end{aligned} \quad (1)$$

for  $\mathbf{S}(\mathbf{x}) = w(\mathbf{x} - \mathbf{x}_i)\mathbf{p}(\mathbf{x})\mathbf{G}^{-1}(\mathbf{x})$ . Hence, once we get the Jacobian and Hessian of  $\mathbf{S}(\mathbf{x})$ , we can easily compute  $\nabla \mathbf{J}$  and  $\nabla^2 \mathbf{J}$ , since  $\mathbf{x}_i$  does not depend on  $\mathbf{x}$ . In our implement, the kernel function is  $w(\mathbf{x} - \mathbf{x}_i)$  is  $w(\mathbf{x} - \mathbf{x}_i) = (1 - \|\mathbf{d}\|^2)^3$ , whose derivatives are:

$$\begin{aligned} \nabla w(\mathbf{x}) &= -6(1 - \mathbf{x}^\top \mathbf{x})^2 \mathbf{x}, \\ \nabla^2 w(\mathbf{x}) &= 6(1 - \mathbf{x}^\top \mathbf{x})(4\mathbf{x}\mathbf{x}^\top - (1 - \mathbf{x}^\top \mathbf{x})\mathbf{I}). \end{aligned} \quad (2)$$

To compute the derivatives of  $\mathbf{G}(\mathbf{x})^{-1}$ , we first derive the derivatives of  $\mathbf{G}(\mathbf{x})$  as:

$$\begin{aligned} \nabla \mathbf{G}(\mathbf{x}) &= \sum_{i=1}^n [\mathbf{p}(\mathbf{x}_i)\mathbf{p}^\top(\mathbf{x}_i) + \sum_j \mathbf{p}_{,j}(\mathbf{x}_i)\mathbf{p}_{,j}^\top(\mathbf{x}_i) \\ &\quad + \sum_{j,k} \mathbf{p}_{,jk}(\mathbf{x}_i)\mathbf{p}_{,jk}^\top(\mathbf{x}_i)] \otimes \nabla w(\mathbf{x} - \mathbf{x}_i), \\ \nabla^2 \mathbf{G}(\mathbf{x}) &= \sum_{i=1}^n [\mathbf{p}(\mathbf{x}_i)\mathbf{p}^\top(\mathbf{x}_i) + \sum_j \mathbf{p}_{,j}(\mathbf{x}_i)\mathbf{p}_{,j}^\top(\mathbf{x}_i) \\ &\quad + \sum_{j,k} \mathbf{p}_{,jk}(\mathbf{x}_i)\mathbf{p}_{,jk}^\top(\mathbf{x}_i)] \otimes \nabla^2 w(\mathbf{x} - \mathbf{x}_i). \end{aligned} \quad (3)$$

$\nabla \mathbf{G}(\mathbf{x})^{-1}$  and  $\nabla^2 \mathbf{G}(\mathbf{x})^{-1}$  can then be computed as:

$$\begin{aligned} \mathbf{G}(\mathbf{x})^{-1} &= -\mathbf{G}(\mathbf{x})^{-1}\mathbf{G}_{,j}(\mathbf{x})\mathbf{G}(\mathbf{x})^{-1}, \\ \mathbf{G}(\mathbf{x})_{,jk}^{-1} &= \mathbf{G}(\mathbf{x})^{-1}\mathbf{G}_{,k}(\mathbf{x})\mathbf{G}(\mathbf{x})^{-1}\mathbf{G}_{,j}(\mathbf{x})\mathbf{G}(\mathbf{x})^{-1} \\ &\quad + \mathbf{G}(\mathbf{x})^{-1}\mathbf{G}_{,j}(\mathbf{x})\mathbf{G}(\mathbf{x})^{-1}\mathbf{G}_{,k}(\mathbf{x})\mathbf{G}(\mathbf{x})^{-1} \\ &\quad - \mathbf{G}(\mathbf{x})^{-1}\mathbf{G}_{,jk}(\mathbf{x})\mathbf{G}(\mathbf{x})^{-1}. \end{aligned} \quad (4)$$

Putting together we have:

$$\begin{aligned} \mathbf{S}_{,j}(\mathbf{x}) &= w_{,j}(\mathbf{x} - \mathbf{x}_i)\mathbf{G}^{-1}(\mathbf{x})\mathbf{p}(\mathbf{x}) \\ &\quad + w(\mathbf{x} - \mathbf{x}_i)\mathbf{G}^{-1}(\mathbf{x})\mathbf{p}_{,j}(\mathbf{x}) \\ &\quad + w(\mathbf{x} - \mathbf{x}_i)\mathbf{G}_{,j}^{-1}(\mathbf{x})\mathbf{p}(\mathbf{x}), \\ \mathbf{S}_{,jk}(\mathbf{x}) &= w_{,jk}(\mathbf{x} - \mathbf{x}_i)\mathbf{G}^{-1}(\mathbf{x})\mathbf{p}(\mathbf{x}) \\ &\quad + w_{,j}(\mathbf{x} - \mathbf{x}_i)\mathbf{G}_{,k}^{-1}(\mathbf{x})\mathbf{p}(\mathbf{x}) \\ &\quad + w_{,j}(\mathbf{x} - \mathbf{x}_i)\mathbf{G}^{-1}(\mathbf{x})\mathbf{p}_{,k}(\mathbf{x}) \\ &\quad + w_{,k}(\mathbf{x} - \mathbf{x}_i)\mathbf{G}^{-1}(\mathbf{x})\mathbf{p}_{,j}(\mathbf{x}) \\ &\quad + w(\mathbf{x} - \mathbf{x}_i)\mathbf{G}_{,k}^{-1}(\mathbf{x})\mathbf{p}_{,j}(\mathbf{x}) \\ &\quad + w(\mathbf{x} - \mathbf{x}_i)\mathbf{G}^{-1}(\mathbf{x})\mathbf{p}_{,jk}(\mathbf{x}) \\ &\quad + w_{,k}(\mathbf{x} - \mathbf{x}_i)\mathbf{G}_{,j}^{-1}(\mathbf{x})\mathbf{p}(\mathbf{x}) \\ &\quad + w(\mathbf{x} - \mathbf{x}_i)\mathbf{G}_{,jk}^{-1}(\mathbf{x})\mathbf{p}(\mathbf{x}) \\ &\quad + w(\mathbf{x} - \mathbf{x}_i)\mathbf{G}_{,j}^{-1}(\mathbf{x})\mathbf{p}_{,k}(\mathbf{x}). \end{aligned} \quad (5)$$

### B. Energy integration

#### B.1. Potential energy

We assume that each IP is a small elastic cuboid  $\Omega_k$ . The elastic potential energy is computed as:

$$\begin{aligned} U_k &= \int_{\Omega_k} \Psi(\mathbf{F}(\mathbf{h}))dV \\ &= \int_{-\frac{h_1}{2}}^{\frac{h_1}{2}} \int_{-\frac{h_2}{2}}^{\frac{h_2}{2}} \int_{-\frac{h_3}{2}}^{\frac{h_3}{2}} \Psi\left(\mathbf{F}\left(\sum_{i=1}^3 x_i \mathbf{c}_i\right)\right) dx_1 dx_2 dx_3. \end{aligned} \quad (6)$$

We give the derivation for two specific energies namely ARAP and Neo-Hookean. For simplicity, we omit the notations of  $dx_1 dx_2 dx_3$ . Also note that:

$$\int_{\Omega_k} x_i x_j \mathbf{c}_i \mathbf{c}_j^\top = 0, \forall i \neq j.$$

**ARAP elasticity.** The ARAP energy density is

$$\Psi(\mathbf{F}) = \|\mathbf{F} - \mathbf{R}\|^2. \quad (7)$$

With first-order approximate the deformation gradient inside the cuboid, the integrated potential is:

$$U_k = \int_{\Omega_k} \|\mathbf{F} + \nabla \mathbf{F} \sum_{i=1}^3 x_i \mathbf{c}_i - \mathbf{R}\|^2 = \frac{V}{12} \text{tr}((\mathbf{F} - \mathbf{R})(\mathbf{F} - \mathbf{R})^\top) + \frac{V}{12} \sum_{i=1}^3 h_i^2 \|\nabla \mathbf{F} \cdot \mathbf{c}_i\|^2. \quad (8)$$

Here,  $\nabla \mathbf{F}$  can be obtained as:

$$\nabla \mathbf{F} = \sum_{j=1}^n \mathbf{u}_j \otimes \nabla^2 N_j, \quad (9)$$

or using generalized coordinates:

$$\nabla \mathbf{F} = \mathbf{q} \cdot \nabla^2 \mathbf{J}^\top. \quad (10)$$

**Neo-Hookean elasticity.** The Neo-Hookean energy density is:

$$\Psi(\mathbf{F}) = \frac{\mu}{2} \left( \text{tr}(\mathbf{F}\mathbf{F}^\top) - 3 \right) - \mu \log J + \frac{\lambda}{2} \log^2 J, \quad (11)$$

where  $J = \det(\mathbf{F})$ . The first term  $\text{tr}(\mathbf{F}\mathbf{F}^\top)$  is integrated as:

$$\begin{aligned} \int_{\Omega_k} \text{tr} \left( (\mathbf{F} + \nabla \mathbf{F} \sum_{i=1}^3 x_i \mathbf{c}_i)(\mathbf{F} + \nabla \mathbf{F} \sum_{i=1}^3 x_i \mathbf{c}_i)^\top \right) \\ = V \text{tr}(\mathbf{F}\mathbf{F}^\top) + \frac{V}{12} \sum_{i=1}^3 h_i^2 \|\nabla \mathbf{F} \cdot \mathbf{c}_i\|^2. \end{aligned} \quad (12)$$

For the two log terms, we integrate based on the first-order approximation  $\log J(\mathbf{x}) = \log J + \frac{\nabla J}{J} \cdot \Delta \mathbf{x}$  at the center of the cuboid. The second term is:

$$\int_{\Omega_k} \log J + \frac{\nabla J}{J} \cdot \Delta \mathbf{x} = V \log J, \quad (13)$$

and the third term is:

$$\begin{aligned} \int_{\Omega_k} \log^2 J + 2 \log J \frac{\nabla J}{J} \cdot \Delta \mathbf{x} + \frac{1}{J^2} \nabla J^\top \Delta \mathbf{x} \Delta \mathbf{x}^\top \nabla J \\ = V \log^2 J + \frac{V}{12 J^2} \nabla J^\top \mathbf{C} \nabla J, \end{aligned} \quad (14)$$

where  $\mathbf{C}$  is the covariance matrix.

We also need to derive  $\nabla J$ . Let  $\mathbf{F} = [\mathbf{f}_1 | \mathbf{f}_2 | \mathbf{f}_3]$ . The determinant of  $\mathbf{F}$  can thus be calculated as  $J = \det(\mathbf{F}) = \mathbf{f}_1 \times \mathbf{f}_2 \cdot \mathbf{f}_3$ . Using the chain rule, we get

$$\nabla J = \frac{\partial J}{\partial \mathbf{F}} : \nabla \mathbf{F}, \quad (15)$$

where  $\frac{\partial J}{\partial \mathbf{F}} = [\mathbf{f}_2 \times \mathbf{f}_3 | \mathbf{f}_3 \times \mathbf{f}_1 | \mathbf{f}_1 \times \mathbf{f}_2]$ . Finally, we can assemble the potential energy of Neo-Hookean using Eqs. (12), (13) and (14).

## B.2. Derivatives of potential energy

To obtain the generalized energy gradient ( $\mathbf{f}_{int}$ ) and Hessian ( $\frac{\partial \mathbf{f}_{int}}{\partial \mathbf{q}}$ ), we focus on  $\Psi_a = \frac{V}{12} \sum_{i=1}^3 h_i^2 \|\nabla \mathbf{F} \cdot \mathbf{c}_i\|^2$  and  $\Psi_b = \frac{V}{12 J^2} \nabla J^\top \mathbf{C} \nabla J$ .

Re-write  $\Psi_a$  as:

$$\Psi_a = \frac{V}{12} \sum_{i_1} \sum_{i_2} \mathbf{u}_{i_1}^\top \mathbf{u}_{i_2} \text{tr}(\nabla^2 N_{i_1} \nabla^2 N_{i_2} \mathbf{C}), \quad (16)$$

where  $\mathbf{u}_i$  is a vector of  $\mathbf{q}$ 's  $3i$ -th row to  $(3i+2)$ -th row,  $N_i \mathbf{I}$  is a matrix consist of the  $3i$ -th to  $(3i+2)$ -th columns of  $\mathbf{J}$ . As  $\Psi_a$  is quadratic w.r.t.  $\mathbf{u}$ , we can directly write the stiffness matrix block of IP  $e$  as:

$$\mathbf{K}_{a,i_1,i_2}^e = \frac{V}{6} \text{tr}(\nabla^2 N_{i_1} \nabla^2 N_{i_2} \mathbf{C}) \mathbf{I}. \quad (17)$$

We assemble blocks of all the IPs to get the system stiffness matrix  $\mathbf{K}_a$  of  $\Psi_a$ .  $\mathbf{f}_{int,a}$  is then computed as  $\mathbf{f}_{int,a} = \mathbf{K}_a \cdot \mathbf{q}$ .

$\Psi_b$  contains many non-linear terms, whose derivatives are more involved. We use the chain rule to calculate  $\mathbf{f}_{int,b}$  and Hessian  $\mathbf{K}_b$ . To assemble these terms, we need  $\frac{\partial J}{\partial \mathbf{q}}$ ,  $\frac{\partial^2 J}{\partial \mathbf{q}^2}$ ,  $\frac{\partial \nabla J}{\partial \mathbf{q}}$  and  $\frac{\partial^2 \nabla J}{\partial \mathbf{q}^2}$ , which are computed as:

$$\begin{aligned} \frac{\partial J}{\partial \mathbf{q}} &= \frac{\partial J}{\partial \mathbf{F}} \frac{\partial \mathbf{F}}{\partial \mathbf{q}}, \\ \frac{\partial^2 J}{\partial \mathbf{q}^2} &= \frac{\partial \mathbf{F}^\top}{\partial \mathbf{q}} : \frac{\partial^2 J}{\partial \mathbf{F}^2} : \frac{\partial \mathbf{F}}{\partial \mathbf{q}}, \\ \frac{\partial \mathbf{F}}{\partial \mathbf{q}} &= \nabla \mathbf{J}. \end{aligned} \quad (18)$$

Here,  $\frac{\partial J}{\partial \mathbf{F}}$  and  $\frac{\partial^2 J}{\partial \mathbf{F}^2}$  can be derived as in any  $J$ -based hyperelastic energy models. Note that  $\mathbf{J}$  should not be confused with the determinant  $J$ . In the following, we denote  $\mathbf{f}^j = \frac{\partial \mathbf{f}}{\partial q_j}$  as the partial differentiation of  $\mathbf{f}$  w.r.t.  $j$ -th row of  $\mathbf{q}$  to avoid high-order tensor notations:

$$\begin{aligned} J_{,i}^j &= \mathbf{f}_{1,i}^j \times \mathbf{f}_2 \cdot \mathbf{f}_3 + \mathbf{f}_1^j \times \mathbf{f}_{2,i} \cdot \mathbf{f}_3 + \mathbf{f}_1^j \times \mathbf{f}_2 \cdot \mathbf{f}_{3,i} \\ &\quad + \mathbf{f}_{1,i} \times \mathbf{f}_2^j \cdot \mathbf{f}_3 + \mathbf{f}_1 \times \mathbf{f}_{2,i}^j \cdot \mathbf{f}_3 + \mathbf{f}_1 \times \mathbf{f}_2^j \cdot \mathbf{f}_{3,i} \\ &\quad + \mathbf{f}_{1,i} \times \mathbf{f}_2 \cdot \mathbf{f}_3^j + \mathbf{f}_1 \times \mathbf{f}_{2,i} \cdot \mathbf{f}_3^j + \mathbf{f}_1 \times \mathbf{f}_2 \cdot \mathbf{f}_{3,i}^j. \end{aligned} \quad (19)$$

$$\begin{aligned} J_{,i}^{jk} &= \mathbf{f}_{1,i}^j \times \mathbf{f}_2^k \cdot \mathbf{f}_3 + \mathbf{f}_1^j \times \mathbf{f}_{2,i}^k \cdot \mathbf{f}_3 + \mathbf{f}_1^j \times \mathbf{f}_2^k \cdot \mathbf{f}_{3,i} \\ &\quad + \mathbf{f}_{1,i}^j \times \mathbf{f}_2 \cdot \mathbf{f}_3^k + \mathbf{f}_1^j \times \mathbf{f}_{2,i} \cdot \mathbf{f}_3^k + \mathbf{f}_1^j \times \mathbf{f}_2 \cdot \mathbf{f}_{3,i}^k \\ &\quad + \mathbf{f}_{1,i}^j \times \mathbf{f}_2^j \cdot \mathbf{f}_3 + \mathbf{f}_1^j \times \mathbf{f}_{2,i}^j \cdot \mathbf{f}_3 + \mathbf{f}_1^j \times \mathbf{f}_2^j \cdot \mathbf{f}_{3,i} \\ &\quad + \mathbf{f}_{1,i} \times \mathbf{f}_2^j \cdot \mathbf{f}_3^k + \mathbf{f}_1 \times \mathbf{f}_{2,i}^j \cdot \mathbf{f}_3^k + \mathbf{f}_1 \times \mathbf{f}_2^j \cdot \mathbf{f}_{3,i}^k \\ &\quad + \mathbf{f}_{1,i}^j \times \mathbf{f}_2 \cdot \mathbf{f}_3^j + \mathbf{f}_1^j \times \mathbf{f}_{2,i} \cdot \mathbf{f}_3^j + \mathbf{f}_1^j \times \mathbf{f}_2 \cdot \mathbf{f}_{3,i}^j \\ &\quad + \mathbf{f}_{1,i} \times \mathbf{f}_2^j \cdot \mathbf{f}_3^j + \mathbf{f}_1 \times \mathbf{f}_{2,i}^j \cdot \mathbf{f}_3^j + \mathbf{f}_1 \times \mathbf{f}_2^j \cdot \mathbf{f}_{3,i}^j. \end{aligned} \quad (20)$$

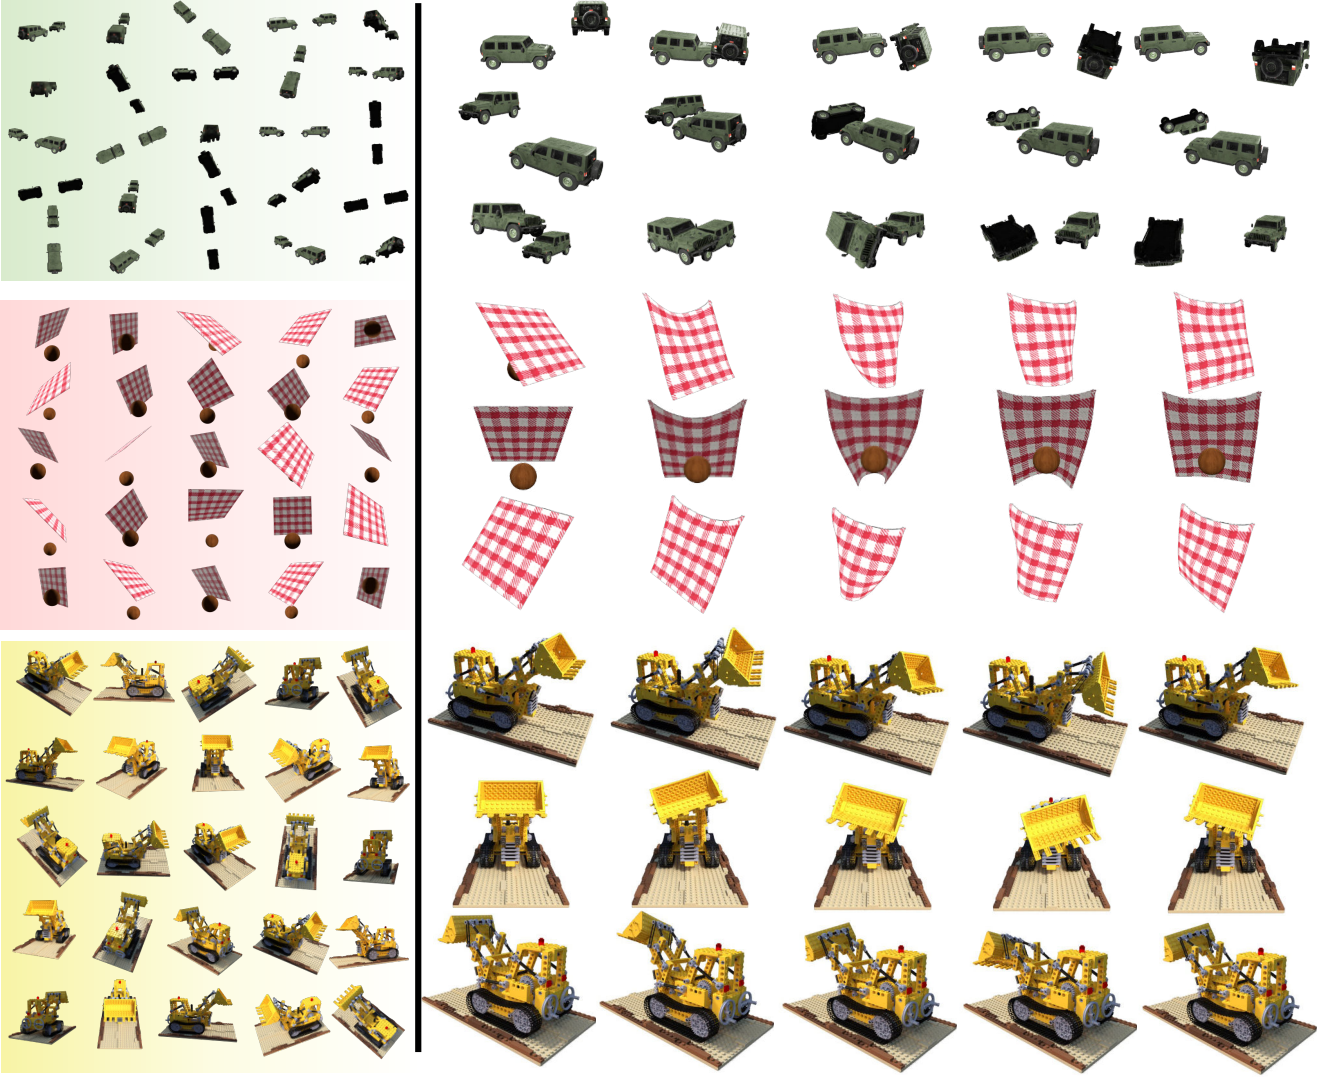

Figure 1. **Multiview dynamics.** We show more results using PIE-NeRF. The left shadowed column gives the input NGP-NeRF training data i.e., static views from different angles. On the right, we show three dynamic scenes, rendered from three different camera poses.

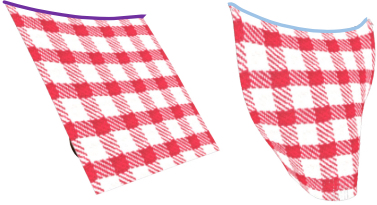

Figure 2. **Locking.** Linear MLS easily yields locking artifact (left) while Q-GMLS used in PIE-NeRF produces plausible results with the same number of DOFs (right).

be assembled as:

$$\frac{\partial \Psi_b}{\partial \mathbf{q}} = -\frac{V}{6J^3} \nabla J^\top \mathbf{C} \nabla J \frac{\partial J}{\partial \mathbf{q}} + \frac{V}{6J^2} \nabla J^\top \mathbf{C} \frac{\partial \nabla J}{\partial \mathbf{q}}, \quad (21)$$

and

$$\begin{aligned} \frac{\partial^2 \Psi_b}{\partial \mathbf{q}^2} = & \frac{V}{2J^4} \nabla J^\top \mathbf{C} \nabla J \frac{\partial J}{\partial \mathbf{q}} \otimes \frac{\partial J}{\partial \mathbf{q}} \\ & - \frac{2V}{3J^3} \left( \nabla J^\top \mathbf{C} \frac{\partial \nabla J}{\partial \mathbf{q}} \right) \otimes \frac{\partial J}{\partial \mathbf{q}} + \frac{V}{6J^2} \frac{\partial \nabla J}{\partial \mathbf{q}}^\top \mathbf{C} \frac{\partial \nabla J}{\partial \mathbf{q}}. \end{aligned} \quad (22)$$

### C. Linear locking

Linear locking refers to the situation where deformation elements exhibit smaller displacements and appear stiffer than

With these components, the Jacobian and Hessian of  $\Psi_b$  can

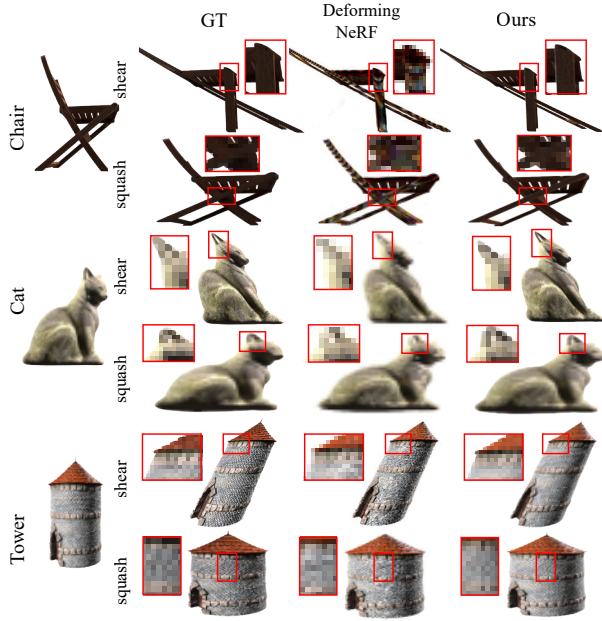

Figure 3. **Comparison with Deforming-NeRF.** We conducted shearing and squashing deformations on various models, with the ground truth generated by direct mesh vertex transformations.

| Deformation |      | Shear         |                | Squash        |                |
|-------------|------|---------------|----------------|---------------|----------------|
| Metrics     |      | MSE↓          | PSNR↑          | MSE↓          | PSNR↑          |
| Chair       | DN*  | 0.0096        | 21.9787        | 0.0076        | 23.1212        |
|             | Ours | <b>0.0022</b> | <b>28.8971</b> | <b>0.0012</b> | <b>31.8755</b> |
| Cat         | DN   | 0.0041        | 26.0174        | 0.0025        | 28.3460        |
|             | Ours | <b>0.0019</b> | <b>29.5765</b> | <b>0.0012</b> | <b>31.7907</b> |
| Tower       | DN   | 0.0066        | 23.7911        | 0.0120        | 20.9451        |
|             | Ours | <b>0.0027</b> | <b>27.9968</b> | <b>0.0037</b> | <b>26.4454</b> |

Table 1. **Quantitative benchmark of Fig. 3:** Compared to deforming NeRF (\*DN in the table), our method consistently demonstrates better performance – lower MSE values and higher PSNR scores across all cases.

they actually are. This is due to the limited capacity of linear deformation models to accurately represent bending and shearing. When simulating codimensional shapes like rods and shells, linear GMLS tends to yield locking artifacts. As shown in Fig. 2, linear GMLS cannot generate correct bending behavior when the cloth collides with the sphere. The cloth acts like a stiff plane.

## D. More results

### D.1. Multiview Dynamics

Fig. 1 reports three additional tests of PIE-NeRF including collision, thin-shell elasticity, and stiff materials. The re-

| Scene    | Sculpture | Ficus   | Cars   | Cloth  | Lego   |
|----------|-----------|---------|--------|--------|--------|
| #PDS     | 25 379    | 105 824 | 80 867 | 43 974 | 48 276 |
| #Kernels | 58        | 78      | 120    | 100    | 96     |
| #IPs     | 150       | 500     | 200    | 300    | 500    |

Table 2. Statistics/Settings of PIE-NeRF experiments.

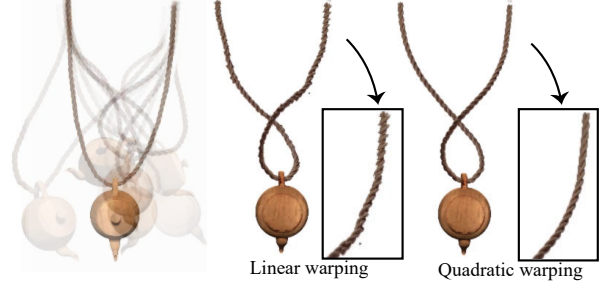

Figure 4. **Codimensional rod and quadratic warping.** Q-GMLS uses quadratic “shape functions” which better handle thin geometries as shown in this example. The rod undergoes large bending and twisting deformation. Linear ray warping tends to generate artifacts, while the quadratic warping used in PIE-NeRF accurately fetches the color information and produces more plausible results.

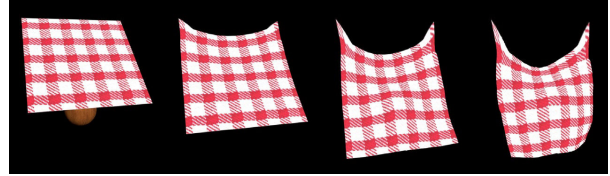

Figure 5. **Thin shell simulation.** PIE-NeRF is also compatible with thin shells. The NeRF-based cloth drops under gravity and hits a sphere.

sulting novel motions of the scene from different views are shown in the figure. In the first example, the cars move under gravity and an initial velocity. They then collide with each other. In the second case, we fix the top corners of a piece of NeRF cloth, which drops on a wooden ball under gravity. In this example, the quadratic interpolation used in Q-GMLS effectively captures the nonlinear cloth dynamics while locking will occur if one chooses to use linear MLS with the same number of simulation DOFs. In the last case, we apply forces to the shovel of the Lego excavator, which has a relatively stiffer material ( $5\times$  stiffer than other examples), resulting in interesting and novel dynamics. We aggregate statistics on the number of particles, kernels, and IPs used in these experiments, as well as those described in the main text for the sculpture and ficus experiments, as summarized in Tab. 2.

## D.2. Deformation Comparison

We benchmark our method against Deforming-NeRF[2] for shear and squash deformation. Given a known deformation gradient field  $\mathbf{u}(\mathbf{x})$ , the ground truth is generated by directly applying it to original mesh vertex positions and rendered via BlenderNeRF [1]. Deforming-NeRF uses  $\mathbf{u}$  to modify its cage mesh to drive the object’s deformation. In our method, we apply  $\mathbf{u}$  on IPs and render the deformed scene using quadratic ray warping. The qualitative results are shown in Fig. 3. The quantitative results are listed in Table 1.

## D.3. Codimensional Shapes

Q-GMLS can capture nonlinear dynamics of thin shapes without locking artifacts. To show this feature, we report two experiments of models with codimensional geometries. Fig. 4 gives snapshots of simulating an elastic rod attached to a teapot. Linear MLS could yield shearing locking easily, while quadratic interpolation avoids this issue. The incorporation of deformation gradient during the shape function computation (i.e., Eq (1)) makes our discretization robust, and the corresponding quadratic warping method yields better images than naïve linear warping as shown in the right of the figure. Fig. 5 shows another example where a thin-shell cloth, implicitly encoded with NGP-NeRF, collides with a sphere. One will easily observe locking issues if linear MLS is used. Please refer to supplementary documents for more results.

## E. Limitations

As any other computational methods, PIE-NeRF has limitations. The quality of PIE-NeRF relies on the quality of NeRF reconstruction. As we sample PDS points from trained NeRF using a fixed and manually-chosen density threshold, floaters in the radiance field may lead to unwanted sample points, affecting both simulation and final rendering results. Partial or inaccurate reconstruction will even fail the simulation, because too many unwanted points will cause incorrect geometric connections, leading to unexpected simulation failures. Insufficient kernels may also result in visual artifacts. If the three nearest IPs which quadratic ray warping is designed to find are not close enough to each other (this is more likely to happen under large deformations), the color as their weighted sum can be inaccurate or incorrect, visually perceived as flickering or floaters in the background.

## References

- [1] Maxime Raafat. BlenderNeRF, May 2023. 5
- [2] Tianhan Xu and Tatsuya Harada. Deforming radiance fields with cages. In *European Conference on Computer Vision*, pages 159–175. Springer, 2022. 5
